# Supplementary material for: Diagnostic accuracy of biomarkers to detect acute mesenteric ischaemia in adult patients: a systematic review and meta-analysis
Source: Springer Nature journal article supplement (doi:10.1186/s13017-023-00512-9), 2023-09-01
Supplement: MOESM2 [file 13017_2023_512_MOESM2_ESM.pdf]

Supplemental Table 1

| First author, year of publication | Study design | Risk of bias      |            |                |                         | Applicability concerns |            |                |
|-----------------------------------|--------------|-------------------|------------|----------------|-------------------------|------------------------|------------|----------------|
|                                   |              | Patient selection | Index test | Reference test | Patient flow and timing | Patient selection      | Index test | Reference test |
| Acosta 2001                       | Cohort       | +                 | -          | +              | -                       | +                      | +          | +              |
| Acosta 2004                       | Cohort       | +                 | -          | +              | +                       | +                      | +          | +              |
| Aktimur 2016                      | Case-control | -                 | +          | +              | -                       | +                      | +          | +              |
| Akyildiz 2009                     | Cohort       | -                 | +          | +              | -                       | +                      | +          | +              |
| Arif 2016                         | Case-control | -                 | +          | +              | -                       | -                      | +          | +              |
| Arnalich 2010                     | Cohort       | +                 | +          | +              | -                       | +                      | +          | +              |
| Bandea 2019                       | Cohort       | -                 | +          | +              | -                       | -                      | +          | +              |
| Beng Fuh 2004                     | Cohort       | +                 | -          | +              | -                       | +                      | +          | +              |
| Björnestadt 1993                  | Cohort       | +                 | +          | +              | -                       | +                      | +          | +              |
| Block 2008                        | Cohort       | +                 | -          | +              | +                       | +                      | +          | +              |
| Bogusevicius 2007                 | Cohort       | -                 | +          | +              | -                       | -                      | +          | +              |
| Bourcier2022                      | Cohort       | +                 | +          | +              | -                       | +                      | +          | +              |
| Brillantino 2018                  | Cohort       | -                 | +          | +              | -                       | +                      | +          | +              |
| Calame 2021                       | Cohort       | +                 | -          | +              | -                       | +                      | +          | +              |
| Chiu 2009                         | Cohort       | +                 | -          | +              | -                       | +                      | +          | +              |
| Collange 2022                     | Case-control | -                 | +          | +              | -                       | +                      | +          | +              |
| Cosse 2013                        | Cohort       | +                 | +          | +              | -                       | ?                      | +          | +              |
| Cosse 2017                        | Cohort       | -                 | +          | +              | -                       | +                      | +          | +              |
| Cronk 2006                        | Cohort       | +                 | -          | +              | -                       | +                      | +          | +              |
| Dai 2018                          | Case-control | -                 | +          | +              | -                       | +                      | +          | +              |
| Degerli 2016                      | Case-control | -                 | +          | -              | -                       | +                      | +          | +              |
| Delaney 1999                      | Cohort       | +                 | ?          | +              | -                       | -                      | +          | +              |
| Durak 2022                        | Cohort       | +                 | +          | +              | -                       | +                      | +          | +              |
| Edwards 2005                      | Case-control | -                 | -          | +              | -                       | +                      | +          | +              |
| Eyvaz 2021                        | Cohort       | -                 | +          | +              | -                       | +                      | +          | +              |

|                     |              |   |   |   |   |   |   |   |
|---------------------|--------------|---|---|---|---|---|---|---|
| Ferrada 2017        | Cohort       | + | + | + | - | + | + | + |
| Fried 1991          | Cohort       | + | + | + | - | + | + | + |
| Gearhart 2003       | Cohort       | + | - | + | - | + | + | + |
| Groesdonk 2015      | Cohort       | + | + | + | - | + | + | + |
| Grotelueschen 2021  | Cohort       | + | - | + | - | + | + | + |
| Gün 2014            | Cohort       | - | + | + | - | + | + | + |
| Gunduz 2007         | Case-control | - | + | + | - | + | + | + |
| Guzel 2013          | Cohort       | + | + | + | - | + | + | + |
| Hong 2017           | Cohort       | + | + | + | - | + | + | + |
| Hot 2016            | Cohort       | + | + | + | - | + | + | + |
| Huang 2018          | Cohort       | + | + | + | - | + | + | + |
| Icoz 2006           | Cohort       | + | ? | + | - | + | + | + |
| Jancelewicz 2009    | Cohort       | + | - | + | - | - | + | + |
| Kanda 1996          | Case-control | - | + | + | - | + | + | + |
| Kanda 2011          | Cohort       | + | + | + | - | + | + | + |
| Karadeniz 2020      | Case-control | - | + | + | - | + | + | + |
| Kim 2020            | Cohort       | - | + | + | - | + | + | + |
| Kintu-Luwaga 2013   | Cohort       | - | ? | + | - | + | + | + |
| Kisaoglu 2014       | Case-control | - | ? | + | - | + | + | + |
| Kittaka 2014        | Cohort       | + | + | + | - | + | + | + |
| Klinge 2015         | Cohort       | + | + | + | - | + | + | + |
| Koami 2015          | Cohort       | + | + | ? | - | + | + | + |
| Kulu 2017           | Cohort       | - | ? | + | - | + | + | + |
| Kurt 2022           | Cohort       | + | - | ? | - | - | + | + |
| Lange 1997          | Cohort       | + | + | + | - | + | + | + |
| Li 2021             | Cohort       | + | + | + | - | - | + | + |
| Ludewig 2017        | Case-control | ? | + | + | - | + | + | + |
| Markogiannakis 2011 | Case-control | - | + | + | - | ? | + | + |
| Matsumoto 2014      | Cohort       | + | + | + | - | + | + | + |
| Matsumoto 2019      | Cohort       | + | + | + | - | + | + | + |
| Mothes 2021         | Cohort       | + | + | + | - | + | + | + |
| Murray 1994         | Cohort       | + | + | + | - | + | + | + |
| Nagata 2008         | Cohort       | + | + | + | - | + | + | + |

|                         |              |   |   |   |   |   |   |   |
|-------------------------|--------------|---|---|---|---|---|---|---|
| Nilsson 2013            | Cohort       | + | + | + | - | + | + | + |
| Nuzzo 2017              | Cohort       | + | + | + | - | + | + | + |
| Nuzzo 2021              | Cohort       | + | + | + | - | + | + | + |
| Poeze 1998              | Cohort       | + | - | - | - | - | ? | - |
| Polk 2008               | Cohort       | + | + | - | - | - | + | + |
| Sadot 2014              | Cohort       | - | + | + | - | - | + | + |
| Salim 2017              | Cohort       | + | + | + | - | + | + | + |
| Schoettler 2021         | Case-control | - | + | + | - | - | + | + |
| Sekino 2017             | Cohort       | + | + | + | - | - | + | + |
| Sgourakis 2013          | Cohort       | - | + | + | - | - | + | + |
| Shi 2015                | Cohort       | + | + | + | - | + | + | + |
| Stroeder 2018           | Cohort       | + | + | + | - | + | + | + |
| Sutherland 2003         | Cohort       | - | + | + | - | + | + | + |
| Tanrikulu 2016          | Cohort       | + | + | + | - | + | + | + |
| Thuijls 2011            | Cohort       | + | + | + | - | + | + | + |
| Türkoglu 2015           | Cohort       | + | + | - | - | + | + | - |
| Uzun 2014               | Cohort       | + | + | ? | - | + | + | ? |
| van der Voort 2014      | Cohort       | - | + | + | - | - | + | + |
| Vermeulen Windsant 2012 | Cohort       | + | + | + | - | - | + | + |
| Wan 2019                | Cohort       | + | + | + | - | + | + | + |
| Woodford 2022           | Cohort       | + | + | + | - | - | + | + |
| Yamamoto 2005           | Cohort       | + | + | + | - | - | + | - |
| Yang 2014               | Cohort       | + | + | - | - | - | + | - |
| Zielinski 2016          | Cohort       | + | + | + | - | - | + | + |
| Zogheib 2018            | Case-control | - | + | + | - | - | + | + |
